# Supplementary material for: Identification of Activated Cdc42-Associated Kinase Inhibitors as Potential Anticancer Agents Using Pharmacoinformatic Approaches
Source: MDPI journal article supplement (doi:10.3390/biom13020217), 2023-01-22
Supplement: s1 [file s1]

Article (Supplementary File)

# Identification of Activated Cdc42-Associated Kinase Inhibitors as Potential Anticancer Agents Using Pharmacoinformatic Approaches

Vikas Kumar, Raj Kumar, Shraddha Parate, Danishuddin, Gihwan Lee, Moonhyuk Kwon, Seong-Hee Jeong, Hyun-Su Ro, Keun Woo Lee and Seon-Won Kim

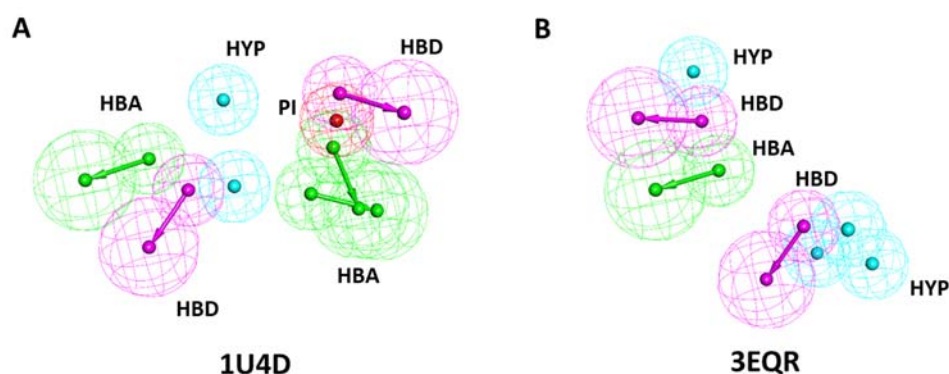

**Figure S1.** Pharmacophore modeling. A) Pharmacophore model based on PDB id: 1U4D, B) and PDB id: 3EQR. The hydrogen bond donor (HBD) and acceptor (HBA) features were shown in pink and green colors. The cyan and red color representing hydrophobic (HYP) and pos ionizable (PI) feature respectively.

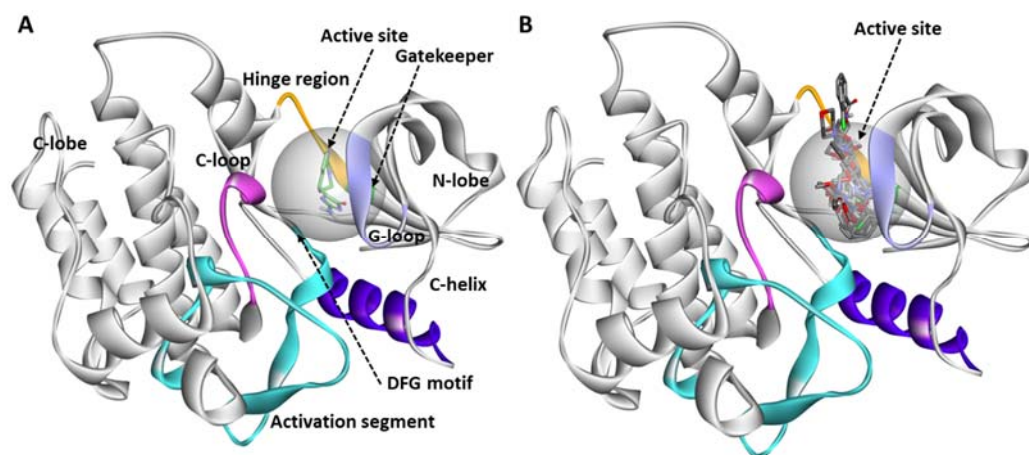

**Figure S2.** The 3D X-ray structure of ACK1 PDB id: 1U4D is used for molecular docking. A) The docking site was defined near the bound ligand. B) The overlay of the selected compounds after molecular docking analysis in the side active site of ACK1.

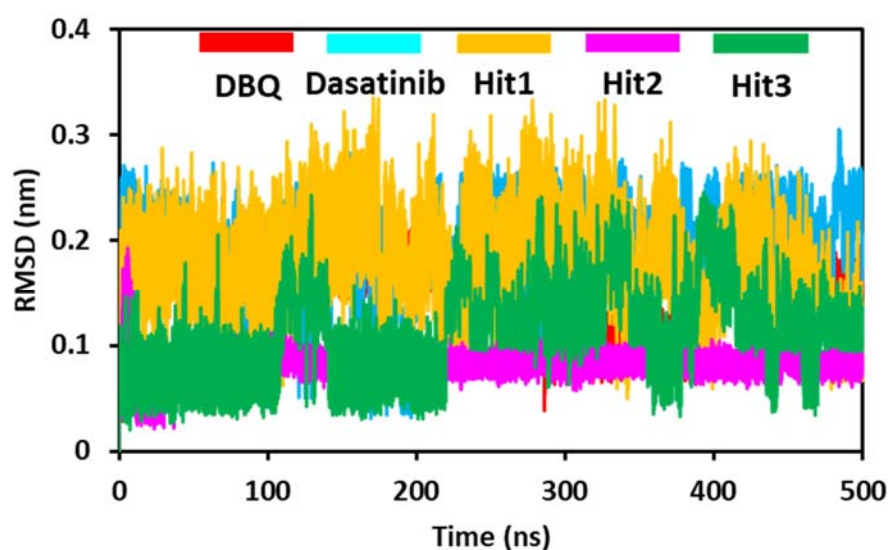

**Figure S3.** RMSD analysis of the selected Hit candidates, co-crystallized ligand DBQ, and dasatinib after 500 ns MD simulation.

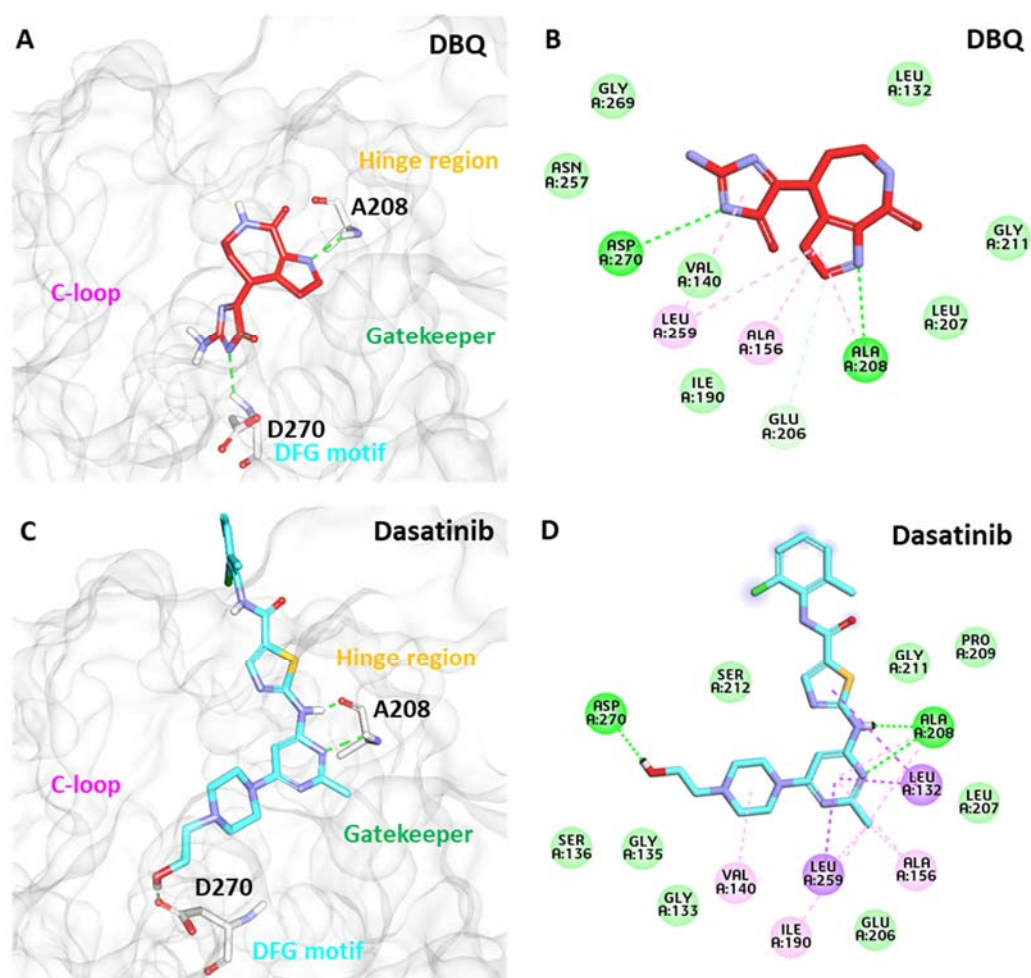

**Figure S4.** The 3D and 2D binding modes of DBQ and dasatinib (shown with cyan stick) inside the active site of ACK1. The upper panel of image A-B) displaying the binding mode of DBQ and the lower panels C-D) displaying Dasatinib. The hydrogen bonds were shown with dark green dashed lines. The van der Waals and pi-alkyl interactions were shown with light green, purple, and pink color spheres.

**Table S1.** Pharmacophore models generated from PDB: 1U4D.

| Pharmacophore models |                    |             |                   |
|----------------------|--------------------|-------------|-------------------|
| Pharmacophore        | Number of Features | Feature Set | Selectivity Score |
| Pharmacophore 01     | 6                  | AADHHP      | 11.498            |
| Pharmacophore 02     | 6                  | AADDHH      | 11.018            |
| Pharmacophore 03     | 6                  | AAADDH      | 11.018            |
| Pharmacophore 04     | 6                  | AADDHH      | 11.018            |
| Pharmacophore 05     | 6                  | AADDHH      | 11.018            |
| Pharmacophore 06     | 6                  | AAADDH      | 11.018            |
| Pharmacophore 07     | 6                  | AAADHH      | 10.104            |
| Pharmacophore 08     | 6                  | AAADHH      | 10.104            |
| Pharmacophore 09     | 5                  | ADHHP       | 9.9830            |
| Pharmacophore 10     | 5                  | AADHP       | 9.9830            |

**Table S2.** Pharmacophore models generated from PDB: 3EQR.

| Pharmacophore Summary |                    |             |                   |
|-----------------------|--------------------|-------------|-------------------|
| Pharmacophore         | Number of Features | Feature Set | Selectivity Score |
| Pharmacophore 01      | 6                  | ADDHHH      | 11.841            |
| Pharmacophore 02      | 6                  | DDHHHH      | 11.841            |
| Pharmacophore 03      | 6                  | ADDHHH      | 11.841            |
| Pharmacophore 04      | 6                  | ADDHHH      | 11.841            |
| Pharmacophore 05      | 6                  | ADDHHH      | 11.841            |
| Pharmacophore 06      | 6                  | ADHHHH      | 10.927            |
| Pharmacophore 07      | 6                  | ADHHHH      | 10.927            |
| Pharmacophore 08      | 5                  | ADDHH       | 10.326            |
| Pharmacophore 09      | 5                  | DDHHH       | 10.326            |
| Pharmacophore 10      | 5                  | DDHHH       | 10.326            |

**Table S3.** List of potential compounds obtained after molecular docking. A total of 11 compounds show better Goldscore and Chemscore than the reference inhibitor.

| Name       | Goldscore | Chemscore | 2D                                                                                    |
|------------|-----------|-----------|---------------------------------------------------------------------------------------|
| Compound 1 | 69.90     | -27.37    | 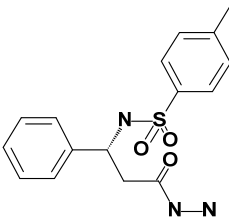 |
| Compound 2 | 68.37     | -27.58    |  |

Compound 3

66.69

-27.00

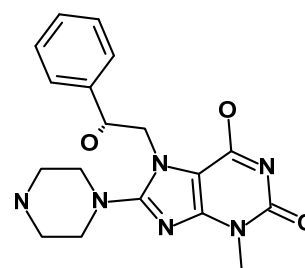

Compound 4

66.02

-28.01

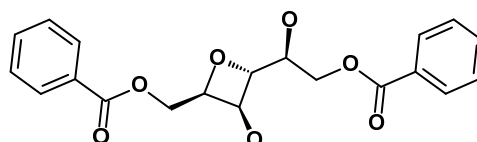

Compound 5

64.70

-25.48

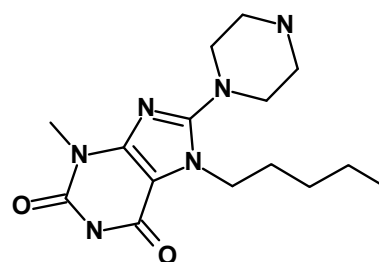

Compound 6

64.59

-31.05

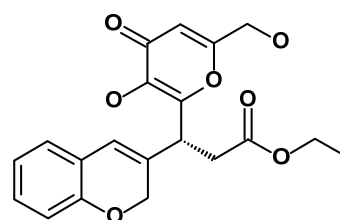

Compound 7

64.24

-27.45

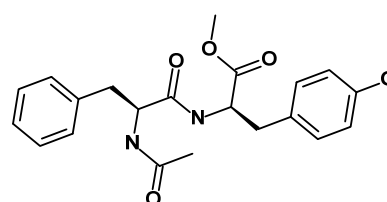

Compound 8

63.96

-28.48

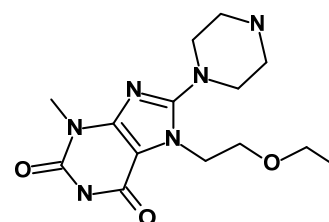

Compound 9

63.91

-26.63

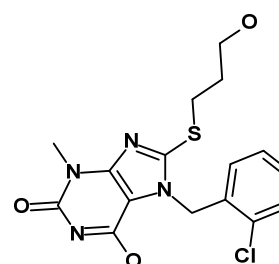

|             |       |        |                                                                                       |
|-------------|-------|--------|---------------------------------------------------------------------------------------|
| Compound 10 | 63.83 | -28.25 | 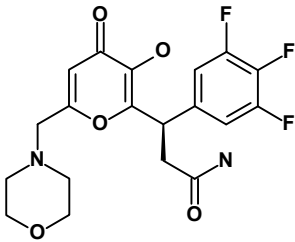   |
| Compound11  | 63.80 | -31.14 |    |
| Dasatinib   | 63.78 | -25.09 |   |
| DBQ         | 45.48 | -22.33 |  |

**Table S4.** The details of binding free energy and H-bond interactions of simulated compounds after 50 ns MD simulations.

| Name        | Binding free energy | H-bond interactions    |
|-------------|---------------------|------------------------|
| Compound 1  | -28.41              | E206                   |
| Compound 2  | -53.40              | P209, S212             |
| Compound 3  | -86.81              | D134, E206, A208, G269 |
| Compound 4  | -76.98              | A208                   |
| Compound 5  | -75.87              | D134, T205, E206, A208 |
| Compound 6  | -62.36              | A208                   |
| Compound 7  | -12.11              | K158, A208, D270       |
| Compound 8  | -64.99              | D134, T205, E206, A208 |
| Compound 9  | -93.35              | T205, E206, A208, N257 |
| Compound 10 | -63.64              | E206, A208, D270       |
| Compound11  | -76.12              | T205, E206, A208, D270 |

**Table S5.** The details of the molecular dynamics simulation system prepared for 500 ns run.

| System           | No. of TIP3P water molecules | No. of Na <sup>+</sup> ions |
|------------------|------------------------------|-----------------------------|
| ACK1 + Hit 1     | 12324                        | 2                           |
| ACK1 + Hit 2     | 12325                        | 2                           |
| ACK1+ Hit 3      | 12327                        | 2                           |
| ACK1 + Dasatinib | 12332                        | 2                           |
| ACK1-DBQ         | 12325                        | 2                           |
| 1U4D_Apo         | 12325                        | 2                           |

**Table S6.** The details of molecular docking and molecular dynamics simulation analysis after 500 ns of selected Hit compounds.

| Name      | Goldscore | Chemscore | Binding free energy | MDS analysis   |               |                |        |
|-----------|-----------|-----------|---------------------|----------------|---------------|----------------|--------|
|           |           |           |                     | RMSD (protein) | RMSD (ligand) | RMSF (protein) | H-bond |
| Hit 1     | 63.91     | -26.63    | -104.18             | 0.19           | 0.17          | 0.08           | 2.75   |
| Hit 2     | 66.69     | -27.00    | -86.31              | 0.17           | 0.08          | 0.09           | 3.23   |
| Hit 3     | 63.80     | -31.14    | -80.23              | 0.20           | 0.11          | 0.11           | 2.62   |
| Dasatinib | 63.78     | -25.09    | -75.42              | 0.18           | 0.19          | 0.10           | 1.84   |
| DBQ       | 45.48     | -22.33    | -43.62              | 0.18           | 0.15          | 0.10           | 1.83   |
| IU4D-Apo  | -         | -         | -                   | 0.24           | -             | 0.11           | -      |

**Table S7.** Binding free energy components of Hit compounds and dasatinib calculated from MM-PBSA method.

| Inhibitors | van der Waals (kJ/mol) | Electrostatic (kJ/mol) | Polar solvation (kJ/mol) | SASA energy (kJ/mol) | Binding energy (kJ/mol) |
|------------|------------------------|------------------------|--------------------------|----------------------|-------------------------|
| Hit1       | -195.08+/-12.71        | -50.67+/-12.64         | 161.19+/-16.62           | -19.61+/-0.92        | -104.18+/-15.99         |
| Hit2       | -197.56+/-11.23        | -59.89+/-6.73          | 191.65+/-15.38           | -20.51+/-0.69        | -86.31+/-13.60          |
| Hit3       | -169.48+/-14.17        | -75.40+/-15.79         | 184.78+/-25.04           | -20.12+/-1.28        | -80.23+/-14.71          |
| Dasatinib  | -162.93+/-11.45        | -36.68+/-12.13         | 141.93+/-26.71           | -17.74+/-1.25        | -75.42+/-17.31          |
| DBQ        | -119.37+/-13.31        | -51.26+/-21.70         | 141.04+/-39.11           | -13.96+/-1.04        | -43.62+/-18.49          |
